# Supplementary material for: A Remote Sensing–based Intensity-Duration Curve, Faifa Mountains, Saudi Arabia
Source: Copernicus journal article supplement (doi:10.5194/nhess-2018-282), 2018-11-26
Supplement: Supplementary file [file nhess-2018-282-AC2-supplement.zip]

# WESTERN MICHIGAN UNIVERSITY

Department of Geological and Environmental Sciences  
College of Arts and Sciences

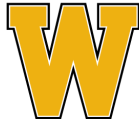

**Date:** 2/25/2019

**Subject:** Submission to Natural Hazards and Earth System Sciences (NHESS) and response to the revision

Dear members of the NHESS Editorial Board,

We are submitting the revised manuscript titled “A Remote Sensing–based Intensity-Duration Threshold, Faifa Mountains, Saudi Arabia” by S. Karki, M. Sultan, S. Al-Sefry, H. Alharbi, M. Emil, R. Elkadiri and E. Alfadail for publication in NHESS. We have addressed all the comments and suggestions made by the two NHESS anonymous reviewers.

I have uploaded our responses through the online portal. We thank all the members of the NHESS Editorial Board and the NHESS anonymous reviewers for their constructive inputs. Addressing the comments and suggestions in the revised text has made it a stronger and more instructive manuscript. We believe that the NHESS provides one of the best platforms for publishing the material presented in the article and we hope that you share our enthusiasm.

Best regards,  
Mohamed Sultan, Ph.D  
Professor and Chairman  
Department of Geological and Environmental Sciences, Western Michigan University
